# Supplementary material for: Emission enhancement in twisted pyridyl salt using a montmorillonite nanoclay by the intercalation and surface-fixation processes
Source: Royal Society of Chemistry journal article supplement (doi:10.1039/d2nj01676a), 2022-01-01
Supplement: d2nj01676a1.pdf [file d2nj01676a1.pdf]

# Emission enhancement in twisted pyridyl salt using Montmorillonite Nano clay by intercalation and surface-fixation process

Shouvik Bhui, Susmita Roy, Chanchal Chakraborty,\* Manab Chakravarty\*

| Topic                                                                                                                                                            | Page No. |
|------------------------------------------------------------------------------------------------------------------------------------------------------------------|----------|
| 1) <b>Fig. S1</b> (a) Synthesis of <b>ATH4PH-MMT</b> composite, and (b) TGA study of MMT, <b>ATH4PH</b> and <b>ATH4PH-MMT</b> composite.                         | 2        |
| 2) <b>Fig. S2</b> PXRD pattern comparison among <b>ATH4P</b> (non-protonated form of <b>ATH4PH</b> ), <b>MMT</b> and <b>ATH4P-MMT</b> mixture                    | 2        |
| 3) <b>Fig. S3</b> <sup>1</sup> H NMR analysis of (a) <b>ATH4PH-MMT</b> and (b) <b>ATH4PH</b>                                                                     | 3        |
| 4) <b>Fig. S4</b> Absorbance spectra of <b>ATH4PH</b> and <b>ATH4PH-MMT</b> in Ethanol (a) 10 <sup>-4</sup> M (b) 10 <sup>-5</sup> M                             | 4        |
| 5) <b>Fig. S5</b> Absorbance spectra of <b>ATH4PH</b> and <b>ATH4PH-MMT</b> in CCl <sub>4</sub> (a) 10 <sup>-4</sup> (M) (b) 10 <sup>-5</sup> (M)                | 4        |
| 6) <b>Fig. S6</b> Emission spectra of <b>ATH4PH</b> and <b>ATH4PH-MMT</b> in CCl <sub>4</sub> at 10 <sup>-4</sup> (M)                                            | 4        |
| 7) <b>Fig. S7</b> Absorbance spectra of <b>ATH4PH</b> and <b>ATH4PH-MMT</b> in 10 <sup>-5</sup> (M) probe concentration (a) CHCl <sub>3</sub> (b) DMSO (c) EtOAc | 5        |
| 8) <b>Fig. S8</b> Absorbance spectra of <b>ATH4PH</b> and <b>ATH4PH-MMT</b> in 10 <sup>-4</sup> (M) probe concentration (a) CHCl <sub>3</sub> (b) DMSO (c) EtOAc | 5        |
| 9) <b>Fig. S9</b> Emission spectra of <b>ATH4PH</b> and <b>ATH4PH-MMT</b> in 10 <sup>-4</sup> (M) probe concentration (a) CHCl <sub>3</sub> (b) DMSO (c) EtOAc   | 5        |
| 10) <b>Table S1</b> Lifetime data (ns) and the related parameters of <b>ATH4PH-MMT</b> at 10 <sup>-5</sup> (M) concentration in different solvents               | 5        |

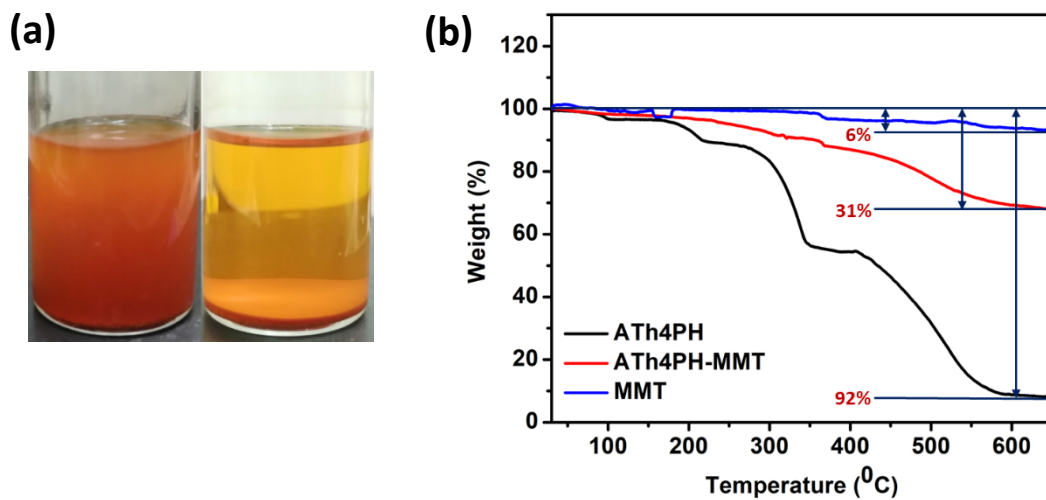

**Fig. S1** (a) Images of the vials (under ambient light) before (left) and after (right) **ATH4PH-MMT** composite precipitation, and (b) TGA study of **MMT**, **ATH4PH** and **ATH4PH-MMT** composite.

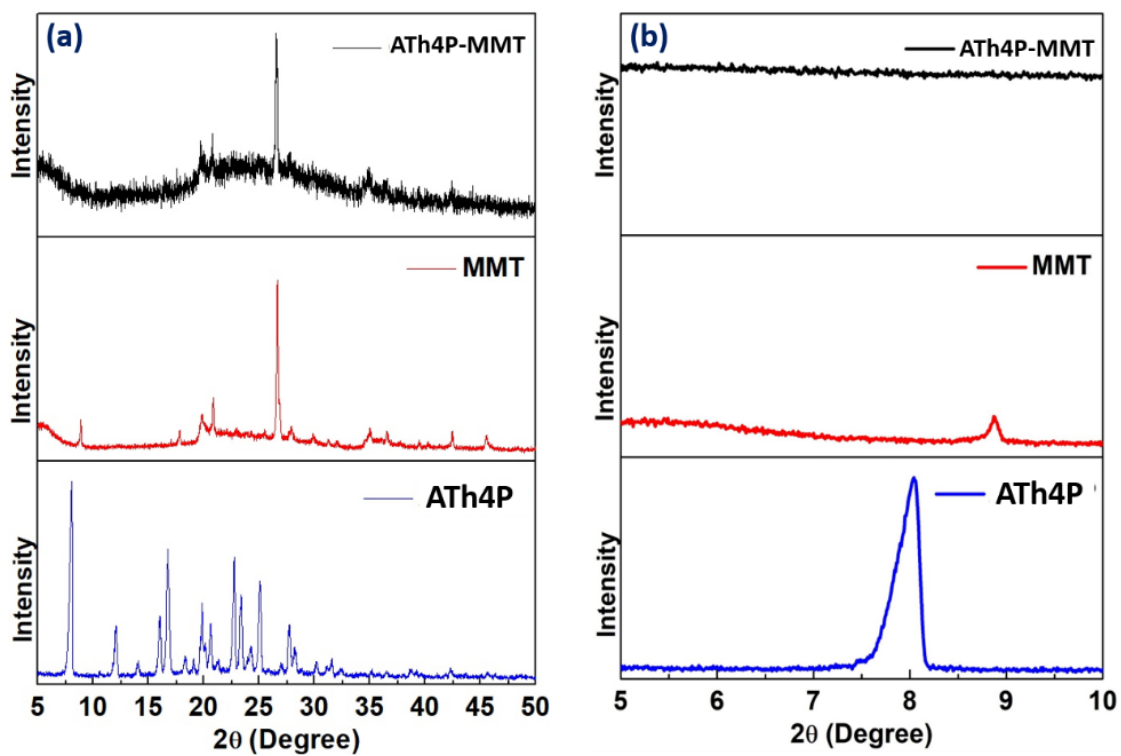

**Fig. S2** PXR D pattern comparison among **ATH4P** (non-protonated form of **ATH4PH**), **MMT** and **ATH4P-MMT** mixture.

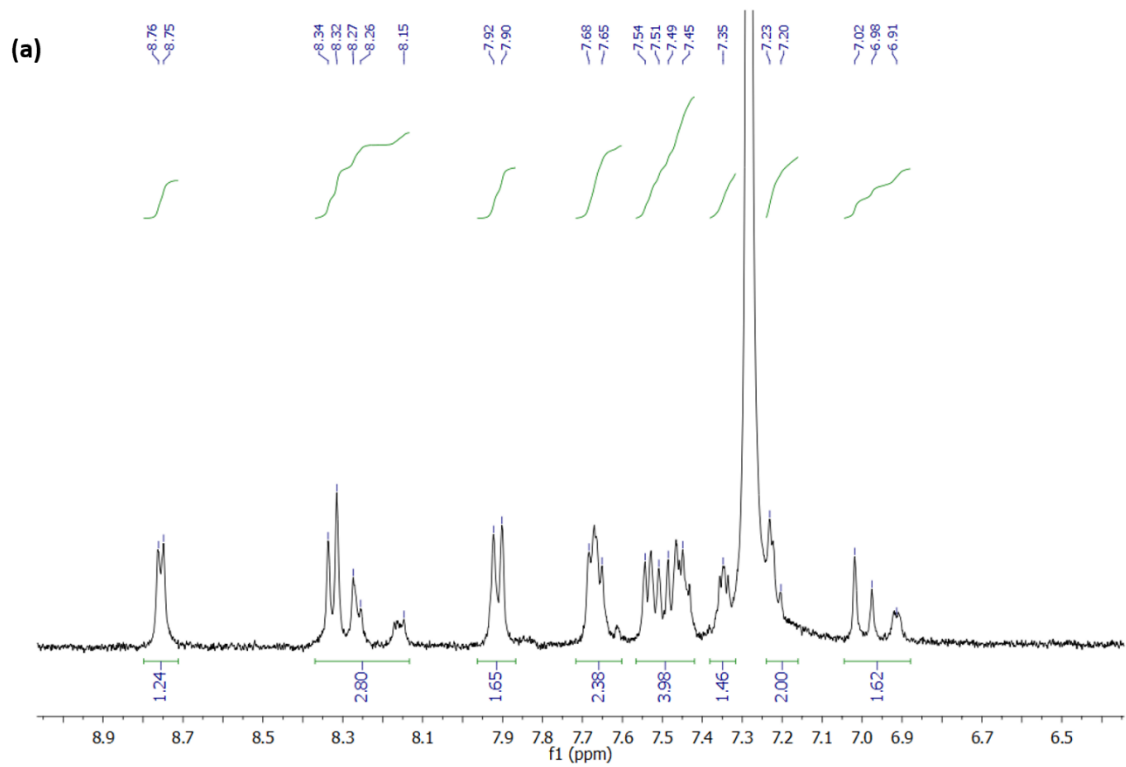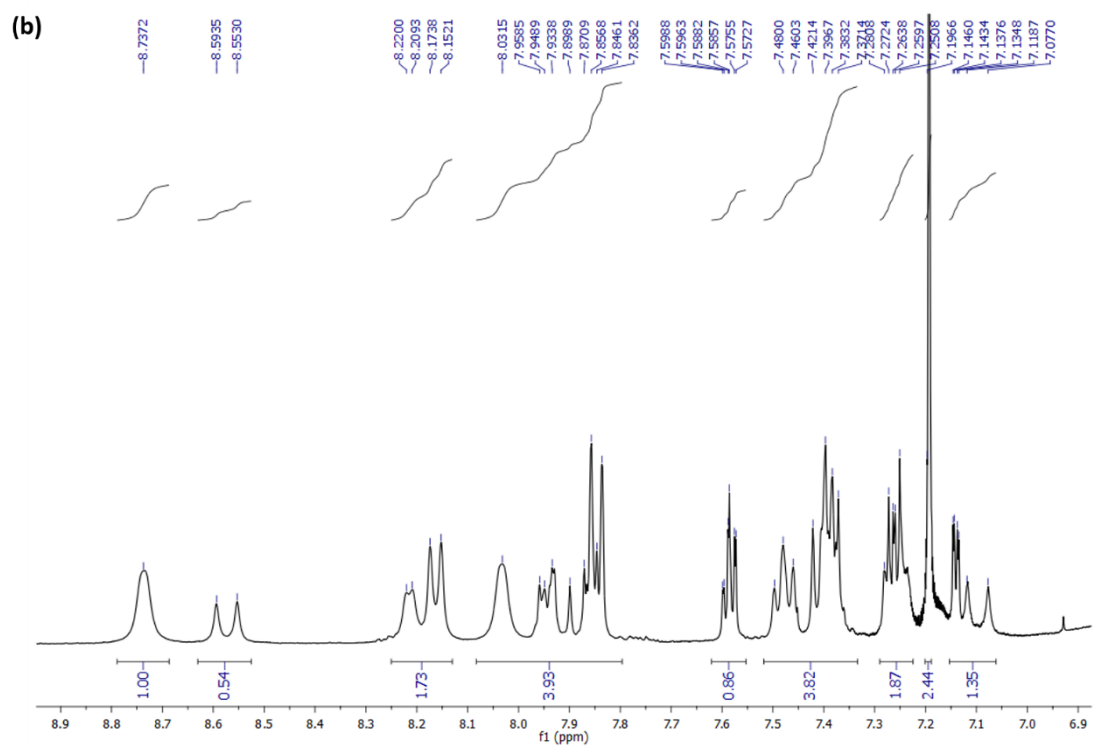

Fig. S3  $^1\text{H}$  NMR analysis of (a) ATH4PH-MMT and (b) ATH4PH

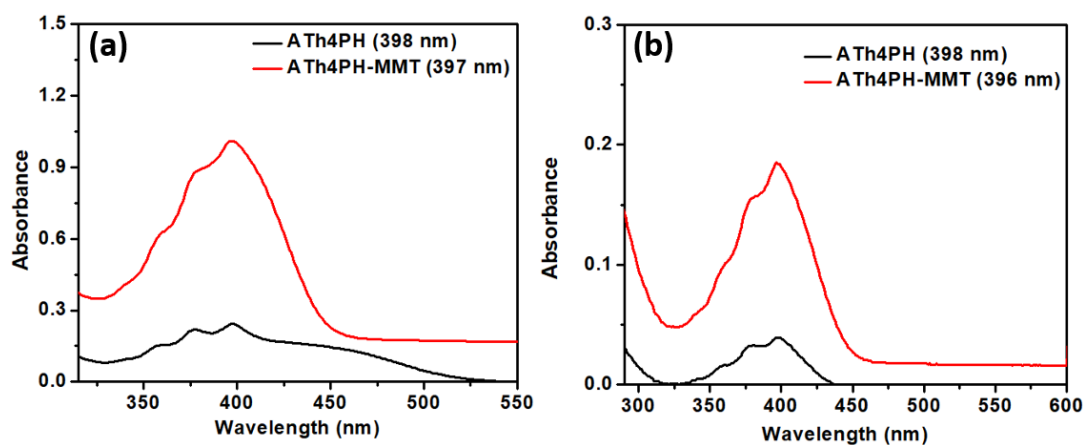

**Fig. S4** Absorbance spectra of **ATh4PH** and **ATh4PH-MMT** in **Ethanol** (a)  $10^{-4}$ (M) (b)  $10^{-5}$ (M)

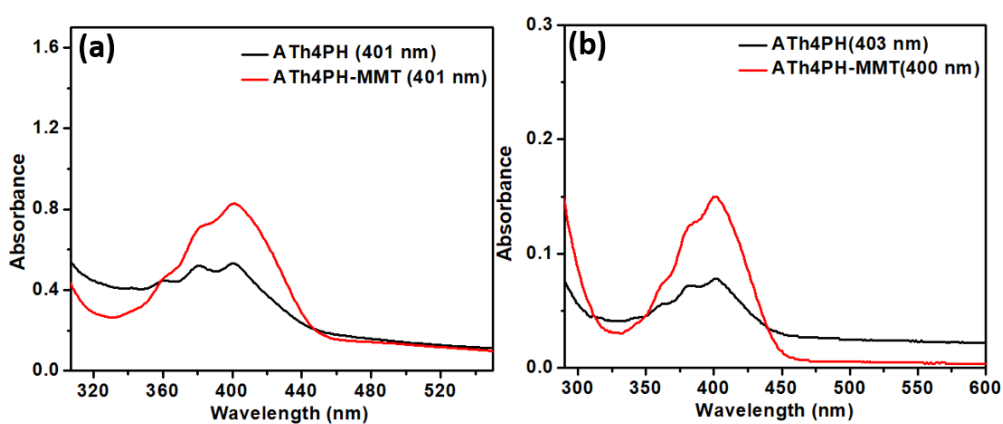

**Fig. S5** Absorbance spectra of **ATh4PH** and **ATh4PH-MMT** in **CCl<sub>4</sub>** (a)  $10^{-4}$ (M) (b)  $10^{-5}$ (M)

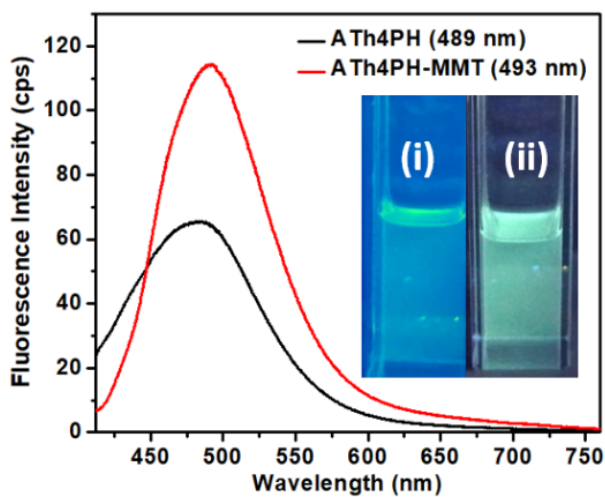

**Fig. S6** Emission spectra of **ATh4PH** and **ATh4PH-MMT** in **CCl<sub>4</sub>** at  $10^{-4}$ (M)

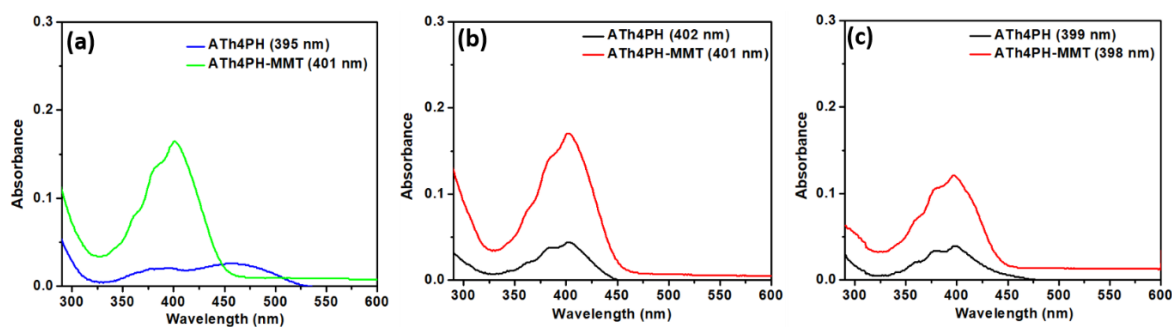

**Fig. S7** Absorbance spectra of **ATh4PH** and **ATh4PH-MMT** in  $10^{-5}$ (M) probe concentration (a)  $\text{CHCl}_3$  (b) DMSO (c) EtOAc

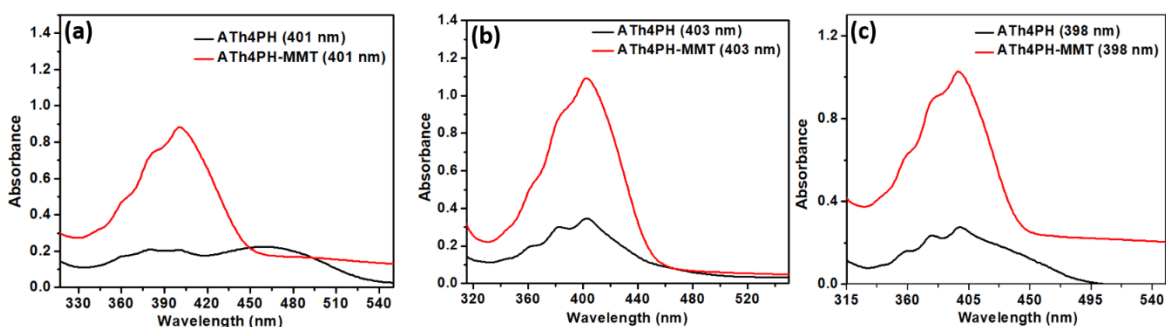

**Fig. S8** Absorbance spectra of **ATh4PH** and **ATh4PH-MMT** in  $10^{-4}$ (M) probe concentration (a)  $\text{CHCl}_3$  (b) DMSO (c) EtOAc

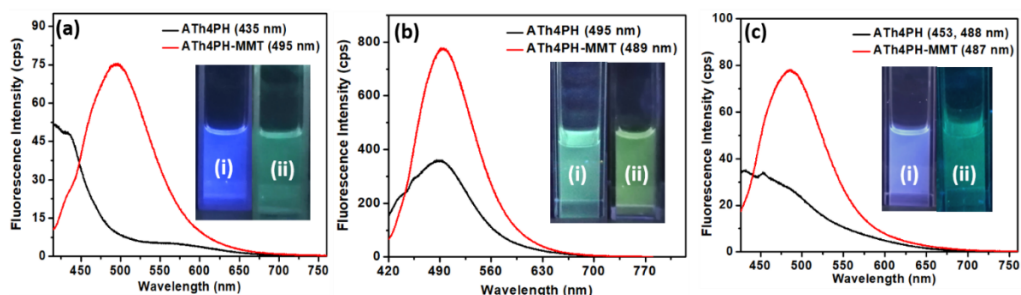

**Fig. S9** Emission spectra of **ATh4PH** and **ATh4PH-MMT** in  $10^{-4}$ (M) probe concentration (a)  $\text{CHCl}_3$  (b) DMSO (c) EtOAc

**Table S1** Lifetime data (ns) and the related parameters of **ATh4PH-MMT** at  $10^{-5}$ (M) concentration in different solvents.  $K_r = \Phi_f / \tau$ ;  $K_{nr} = (1 - \Phi_f) / \tau$

| Solvent         | $\tau_1$ | $\tau_2$ | $\tau_3$ | $\tau_4$ | $\alpha_1$ | $\alpha_2$ | $\alpha_3$ | $\alpha_4$ | $\chi^2$ | $\tau$ (ns) | $\Phi_f$ (%) | $k_r (\times 10^6 \text{ s}^{-1})$ | $K_{nr} (\times 10^6 \text{ s}^{-1})$ | $k_r / K_{nr}$ |
|-----------------|----------|----------|----------|----------|------------|------------|------------|------------|----------|-------------|--------------|------------------------------------|---------------------------------------|----------------|
| Ethanol         | 0.5141   | 4.8368   | 0.0200   | -        | 0.0015     | 0.0001     | 0.9982     | -          | 1.0376   | 0.0217      | 0.33         | 15.2073                            | 30.8755                               | 0.4925         |
| $\text{CCl}_4$  | 0.1551   | 1.0829   | 2.3634   | 0.0527   | 0.0780     | 0.0103     | 0.0049     | 0.9067     | 1.0426   | 0.0828      | 0.61         | 7.3494                             | 11.0772                               | 0.6634         |
| $\text{CHCl}_3$ | 0.3121   | 1.0431   | 4.4754   | 0.0277   | 0.0051     | 0.0022     | 0.0003     | 0.9923     | 1.0827   | 0.0328      | 0.09         | 2.7439                             | 27.7439                               | 0.0989         |
| DMSO            | 1.0612   | 4.9807   | 0.0351   | -        | 0.0035     | 0.0005     | 0.9959     | -          | 1.0197   | 0.0414      | 0.10         | 2.4154                             | 27.7391                               | 0.0871         |
| EtOAc           | 0.3496   | 1.5399   | 5.1365   | 0.0248   | 0.0057     | 0.0028     | 0.0010     | 0.9906     | 1.0159   | 0.0359      | 0.15         | 4.1783                             | 23.6789                               | 0.1765         |

END
